# Supplementary material for: Experiences of coercion to sterilize and forced sterilization among women living with HIV in Latin America
Source: PubMed Central journal article supplement (PMC4374084; doi:10.7448/ias.18.1.19462), 2015-03-24
Supplement: JIAS-18-19462-s001.pdf [file JIAS-18-19462-s001.pdf]

**Table 3: Social and economic characteristics and fertility history of women living with HIV (frequency of missing values)**

| <i>Social Characteristics</i>    |     |      |                                             |     |      |
|----------------------------------|-----|------|---------------------------------------------|-----|------|
| <i>Age</i>                       | #   | %    | <i>Education</i>                            | #   | %    |
| ≤24                              | 23  | 8.1  | None                                        | 19  | 6.7  |
| 25-34                            | 100 | 35.1 | Primary                                     | 137 | 48.1 |
| 35-44                            | 89  | 31.2 | Secondary                                   | 74  | 26.0 |
| 45+                              | 67  | 23.5 | More than Secondary                         | 50  | 17.5 |
| Missing                          | 6   | 2.1  | Missing                                     | 5   | 1.8  |
| <i>Married/Cohabiting</i>        | #   | %    | <i>Sex Worker</i>                           | #   | %    |
| No                               | 158 | 55.4 | No                                          | 258 | 90.5 |
| Yes                              | 122 | 42.8 | Yes                                         | 24  | 8.4  |
| Missing                          | 5   | 1.8  | Missing                                     | 3   | 1.1  |
| <i>Indigenous</i>                | #   | %    | <i>African Descent</i>                      | #   | %    |
| No                               | 240 | 84.2 | No                                          | 252 | 88.4 |
| Yes                              | 37  | 13.0 | Yes                                         | 20  | 7.0  |
| Missing                          | 8   | 2.8  | Missing                                     | 13  | 4.6  |
| <i>Economic Characteristics</i>  |     |      |                                             |     |      |
| <i>Housing Status</i>            | #   | %    | <i>Home Internet</i>                        | #   | %    |
| Owners                           | 145 | 50.9 | No                                          | 231 | 81.1 |
| Borrowers                        | 73  | 25.6 | Yes                                         | 51  | 17.9 |
| Renters                          | 59  | 20.7 | Missing                                     | 3   | 1.1  |
| Homeless                         | 7   | 2.5  |                                             |     |      |
| Missing                          | 1   | 0.4  |                                             |     |      |
| <i>Firewood for Cooking</i>      | #   | %    | <i>Cement Floor</i>                         | #   | %    |
| No                               | 232 | 81.4 | No                                          | 132 | 46.3 |
| Yes                              | 50  | 17.5 | Yes                                         | 150 | 52.6 |
| Missing                          | 3   | 1.1  | Missing                                     | 3   | 1.1  |
| <i>Fertility History</i>         |     |      |                                             |     |      |
| <i>Number of living children</i> | #   | %    | <i>Pregnancy with a known HIV diagnosis</i> | #   | %    |
| None                             | 40  | 14.0 | No                                          | 133 | 46.7 |
| One                              | 43  | 15.1 | Yes                                         | 77  | 27.0 |
| Two or More                      | 198 | 69.5 | Missing                                     | 75  | 26.3 |
| Missing                          | 4   | 1.4  |                                             |     |      |

Table 3 provides the frequencies of missing data for the social and economic characteristics and fertility history of the participant women living with HIV.
